# Supplementary material
Source: Research Square preprint supplement (doi:10.21203/rs.3.rs-8781128/v1)
Supplement: Supplementary file 1 [file bf2ba59862bee5798724d247.pdf]

Supplementary Information for

## **A New Pathway for Cross-Scale Energy Transfer during Solar Wind–Magnetosphere Interaction**

Z. Z. Chen<sup>1,2</sup>, H. S. Fu<sup>1,2</sup>, J. B. Cao<sup>1,2</sup>, J. Yu<sup>3</sup>, T. Y. Wang<sup>4</sup>, O. Le Contel<sup>5</sup>, C. T. Russell<sup>6</sup>, C. J. Pollock<sup>7</sup>, P. A. Lindqvist<sup>8</sup>, R. E. Ergun<sup>9</sup>, J. P. McFadden<sup>10</sup>, W. D. Fu<sup>1,2</sup>, Z. Y. Xu<sup>1,2</sup>, Z. Z. Guo<sup>11</sup>, Y. Yu<sup>1,2</sup>, J. Wang<sup>3</sup>, J. Cui<sup>3</sup>, J. L. Burch<sup>12</sup>

<sup>1</sup>School of Space and Earth Sciences, Beihang University, Beijing, China

<sup>2</sup>Key Laboratory of Space Environment Monitoring and Information Processing, Ministry of Industry and Information Technology, Beijing, China

<sup>3</sup>Planetary Environmental and Astrobiological Research Laboratory (PEARL), School of Atmospheric Sciences, Sun Yat-sen University, Zhuhai, China

<sup>4</sup>School of Earth Sciences, Yunnan University, Yunnan, China

<sup>5</sup>Laboratoire de Physique des Plasmas, CNRS-Ecole Polytechnique, UPMC, Palaiseau, France

<sup>6</sup>Department of Earth, Planetary and Space Sciences, University of California, Los Angeles, CA, USA

<sup>7</sup>Denali Scientific, San Antonio, TX, USA

<sup>8</sup>KTH Royal Institute of Technology, Stockholm, Sweden

<sup>9</sup>Department of Astrophysical and Planetary Sciences, University of Colorado Boulder, CO, USA

<sup>10</sup>Space Sciences Laboratory, University of California at Berkeley, Berkeley, CA, USA

<sup>11</sup>Faculty of Information Engineering and Automation, Kunming University of Science and Technology, Kunming, China

<sup>12</sup>Southwest Research Institute, San Antonio, TX, USA

Correspondence to Z. Z. Chen at [chenzzh@buaa.edu.cn](mailto:chenzzh@buaa.edu.cn)

and H. S. Fu at [hsfu@buaa.edu.cn](mailto:hsfu@buaa.edu.cn)

This file includes:

Supplementary Fig. 1.

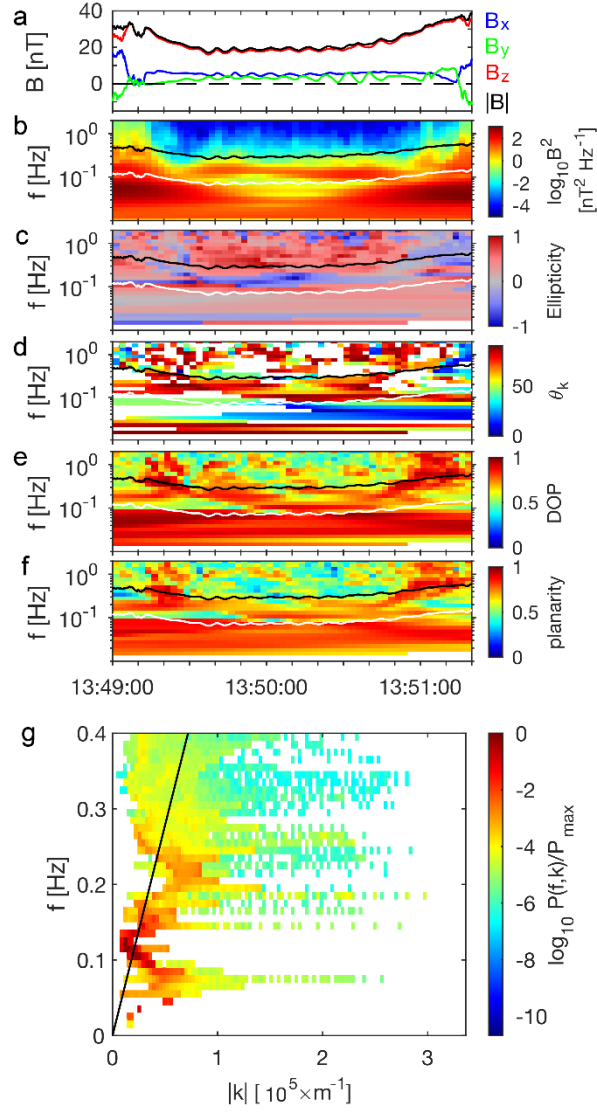

**Supplementary Fig. 1. Properties and dispersion relation of ULF waves.** The data was detected by MMS. **a-f**, Wave polarization analysis showing magnetic field (**a**), power spectral density of the magnetic field (**b**), ellipticity (**c**), wave normal angle (**d**), degree of polarization (**e**) and planarity (**f**). The black and white curves in panels **b-f** represent proton gyrofrequency ( $f_{cp}$ ) and ionized helium ( $He^+$ ) gyrofrequency ( $f_{che}$ ), respectively. **g**, Observed dispersion relation showing wave power versus frequency and wave number. The black line in panel **g** denote the average wave speed  $v \sim 350$  km/s. The wave dispersion relation can be resolved using the cross power spectral between the magnetic or electric fields measured by four spacecraft. The phase difference  $\Delta\psi$  between the detected waves by any spacecraft pair is determined by  $\Delta\psi = \arctan\left(\frac{\text{Im}(\langle W_\alpha(f,t)W_\beta^*(f,t) \rangle)}{\text{Re}(\langle W_\alpha(f,t)W_\beta^*(f,t) \rangle)}\right)$ , where  $W_\alpha$  and  $W_\beta$  are the wavelet transforms of detected fields by any spacecraft pair. The corresponding wave vector for a specific frequency can be then determined by incorporating the inter-spacecraft separation.
